# Supplementary material for: Improving Bioaccessibility and Bioavailability of Isoflavone Aglycones from Chickpeas by Germination and Forming β-Cyclodextrin Inclusion Complexes
Source: MDPI journal article supplement (doi:10.3390/pharmaceutics15122684), 2023-11-27
Supplement: s1 [file s1]

# Improving bioaccessibility and bioavailability of isoflavone aglycones from chickpeas by germination and forming $\beta$ -cyclodextrin inclusion complexes

Electronic Supplementary Information (ESI) available: [Table S1, S2, S3, S4, S5, S6, S7, S8, S9 and Figure S1, S2, S3, S4, S5].

**Table S1.** The MS/MS parameter for FMN, BCA and CHL.

| Compounds | Molecular formula                                                             | Precursor ion<br>( <i>m/z</i> ) | Product ion<br>( <i>m/z</i> ) | Cone voltage (V) | Collision energy (V) |
|-----------|-------------------------------------------------------------------------------|---------------------------------|-------------------------------|------------------|----------------------|
| FMN       | C <sub>16</sub> H <sub>12</sub> O <sub>4</sub>                                | 267.04                          | 252.06                        | 60               | 18                   |
| BCA       | C <sub>16</sub> H <sub>12</sub> O <sub>5</sub>                                | 283.10                          | 268.08                        | 40               | 20                   |
| CHL (IS)  | C <sub>11</sub> H <sub>12</sub> Cl <sub>2</sub> N <sub>2</sub> O <sub>5</sub> | 321.04                          | 151.95                        | 60               | 18                   |

**Table S2.** Principal isoflavones in germinated chickpea.

| Retention time (min) | [M+H] <sup>+</sup><br>( <i>m/z</i> ) | Compounds                      | Molecular formula                               |
|----------------------|--------------------------------------|--------------------------------|-------------------------------------------------|
| 24.72                | 517.02                               | Formononetin malonyl glycoside | C <sub>25</sub> H <sub>24</sub> O <sub>12</sub> |
| 26.72                | 533.06                               | Biochanin A malonyl glycoside  | C <sub>25</sub> H <sub>24</sub> O <sub>13</sub> |
| 29.64                | 269.24                               | Formononetin                   | C <sub>16</sub> H <sub>12</sub> O <sub>4</sub>  |
| 32.65                | 285.21                               | Biochanin A                    | C <sub>16</sub> H <sub>12</sub> O <sub>5</sub>  |

**Table S3.** Peak area of FMNG, BCAG, FMN, and BCA in chickpeas with different germination days.

| Time (h) | Peak area |         |         |         |
|----------|-----------|---------|---------|---------|
|          | FMNG      | BCAG    | FMN     | BCA     |
| 0        | 38.50     | 35.00   | 0.00    | 0.00    |
| 0.5      | 42.00     | 34.20   | 0.00    | 17.00   |
| 1        | 92.40     | 49.80   | 13.40   | 14.30   |
| 2        | 391.60    | 275.20  | 144.40  | 104.20  |
| 3        | 790.30    | 544.80  | 188.40  | 128.60  |
| 4        | 1184.20   | 1260.70 | 993.00  | 639.40  |
| 5        | 1731.00   | 2108.00 | 1772.80 | 1753.10 |
| 6        | 2559.40   | 3317.60 | 2526.90 | 2405.20 |
| 7        | 2735.30   | 5994.90 | 4865.90 | 5790.40 |
| 8        | 3018.60   | 7919.30 | 5336.40 | 6933.20 |
| 9        | 2684.40   | 8040.40 | 5096.10 | 7836.90 |
| 10       | 2551.20   | 7960.50 | 4905.80 | 8149.30 |

**Table S4.** Factors and levels of orthogonal experiments.

| Level | Factor              |             |                       |
|-------|---------------------|-------------|-----------------------|
|       | A, Temperature (°C) | B, Time (h) | C, Mixing speed (rpm) |
| 1     | 30                  | 0.5         | 400                   |
| 2     | 40                  | 1           | 600                   |
| 3     | 50                  | 2           | 800                   |

**Table S5.** The orthogonal experiments result for FMN.

| Number | A, Temperature (°C) | B, Time (h) | C, Mixing speed (rpm) | Blank  | Inclusion rate (%) |
|--------|---------------------|-------------|-----------------------|--------|--------------------|
| 1      | 1 (30)              | 1 (0.5)     | 1 (400)               | 1      | 36.94 ± 0.90       |
| 2      | 1                   | 2 (1)       | 2 (600)               | 2      | 40.92 ± 0.97       |
| 3      | 1                   | 3 (2)       | 3 (800)               | 3      | 39.40 ± 0.30       |
| 4      | 2 (40)              | 1           | 2                     | 3      | 48.27 ± 0.71       |
| 5      | 2                   | 2           | 3                     | 1      | 51.99 ± 0.99       |
| 6      | 2                   | 3           | 1                     | 2      | 53.31 ± 1.67       |
| 7      | 3 (50)              | 1           | 3                     | 2      | 33.53 ± 1.62       |
| 8      | 3                   | 2           | 1                     | 3      | 38.53 ± 1.43       |
| 9      | 3                   | 3           | 2                     | 1      | 39.26 ± 0.48       |
| K1     | 117.26              | 118.74      | 128.78                | 128.20 |                    |
| K2     | 153.57              | 131.44      | 128.44                | 127.76 |                    |
| K3     | 111.31              | 131.96      | 124.92                | 126.19 |                    |
| k1     | 39.09               | 39.58       | 42.93                 | 42.73  |                    |
| k2     | 51.19               | 43.81       | 42.81                 | 42.59  |                    |
| k3     | 37.10               | 43.99       | 41.64                 | 42.06  |                    |
| R      | 14.09               | 4.41        | 1.29                  | 0.67   |                    |

**Table S6.** The orthogonal experiments result for BCA.

| Number | A, Temperature (°C) | B, Time (h) | C, Mixing speed (rpm) | Blank  | Inclusion rate (%) |
|--------|---------------------|-------------|-----------------------|--------|--------------------|
| 1      | 1 (30)              | 1 (0.5)     | 1 (400)               | 1      | 68.11 ± 0.28       |
| 2      | 1                   | 2 (1)       | 2 (600)               | 2      | 71.35 ± 0.76       |
| 3      | 1                   | 3 (2 )      | 3 (800)               | 3      | 71.56 ± 0.44       |
| 4      | 2 (40)              | 1           | 2                     | 3      | 75.94 ± 0.74       |
| 5      | 2                   | 2           | 3                     | 1      | 80.50 ± 1.00       |
| 6      | 2                   | 3           | 1                     | 2      | 81.79 ± 0.76       |
| 7      | 3 (50)              | 1           | 3                     | 2      | 65.74 ± 0.34       |
| 8      | 3                   | 2           | 1                     | 3      | 69.63 ± 0.02       |
| 9      | 3                   | 3           | 2                     | 1      | 68.99 ± 0.22       |
| K1     | 211.01              | 209.79      | 219.53                | 217.60 |                    |
| K2     | 238.23              | 221.48      | 216.27                | 218.88 |                    |
| K3     | 204.36              | 222.34      | 217.80                | 217.12 |                    |
| k1     | 70.34               | 69.93       | 73.18                 | 72.53  |                    |
| k2     | 79.41               | 73.83       | 72.09                 | 72.96  |                    |
| k3     | 68.12               | 74.11       | 72.60                 | 72.37  |                    |
| R      | 11.29               | 4.18        | 1.09                  | 0.59   |                    |

**Table S7.** Results of curve fitting of in vitro releasing from the CSE and inclusion complex.

| Models        | Regression co-efficient  |              |                   |              |                             |              |                   |              |
|---------------|--------------------------|--------------|-------------------|--------------|-----------------------------|--------------|-------------------|--------------|
|               | Artificial gastric juice |              |                   |              | artificial intestinal juice |              |                   |              |
|               | CSE                      |              | inclusion complex |              | CSE                         |              | inclusion complex |              |
|               | FMN                      | BCA          | FMN               | BCA          | FMN                         | BCA          | FMN               | BCA          |
| Zero Order    | 0.851                    | 0.845        | 0.376             | 0.432        | 0.864                       | 0.862        | 0.520             | 0.543        |
| First Order   | 0.885                    | 0.870        | 0.846             | 0.611        | 0.889                       | 0.865        | 0.675             | 0.594        |
| Higuchi       | <u>0.992</u>             | <u>0.984</u> | 0.653             | 0.710        | <u>0.982</u>                | <u>0.902</u> | 0.772             | 0.768        |
| Ritger-Peppas | 0.988                    | 0.984        | 0.819             | 0.841        | 0.975                       | 0.862        | 0.929             | 0.904        |
| Hixon-Crowell | 0.874                    | 0.862        | 0.744             | 0.547        | 0.881                       | 0.864        | 0.625             | 0.577        |
| Weibull       | 0.984                    | 0.974        | <u>0.912</u>      | <u>0.903</u> | 0.975                       | 0.894        | <u>0.950</u>      | <u>0.912</u> |

**Table S8.** The regression equation, precision, accuracy, extraction recoveries, matrix effects and stability of FMN and BCA in rat plasma.

| Compounds                 |                    | FMN                |               |               | BCA                |                |               |
|---------------------------|--------------------|--------------------|---------------|---------------|--------------------|----------------|---------------|
| Calibration range (ng/mL) |                    | 0.25-250.00        |               |               | 0.25-250.00        |                |               |
| Regression equation       |                    | Y=0.0468X + 0.0235 |               |               | Y=0.0450X - 0.0226 |                |               |
| Correlation coefficient   |                    | 0.9995             |               |               | 0.9993             |                |               |
| LLOQs (ng/mL)             |                    | 0.25               |               |               | 0.25               |                |               |
| Spiked conc. (ng/mL)      |                    | 1                  | 50            | 150           | 1                  | 50             | 150           |
| Measured conc. (ng/mL)    |                    | 1.04 ± 0.03        | 47.43 ± 1.98  | 149.56 ± 6.12 | 1.04 ± 0.04        | 48.18 ± 2.62   | 141.84 ± 5.01 |
| Intra-day                 | Precision (RSD, %) | 3.12               | 4.18          | 4.09          | 4.13               | 5.45           | 3.53          |
|                           | Accuracy (RE, %)   | 3.81               | -5.15         | -0.29         | 4.11               | -3.64          | -5.44         |
| Inter-day                 | Precision (RSD, %) | 5.09               | 7.32          | 3.60          | 5.53               | 6.41           | 4.65          |
|                           | Accuracy (RE, %)   | 2.72               | -1.09         | 0.39          | 5.13               | 2.53           | -0.11         |
| Recovery %                |                    | 85.74 ± 5.77       | 86.12 ± 4.23  | 98.00 ± 7.58  | 86.76 ± 11.45      | 87.19 ± 10.71  | 83.13 ± 8.84  |
| Matrix effect %           |                    | 109.13 ± 4.26      | 119.07 ± 7.86 | 101.44 ± 9.93 | 88.63 ± 9.33       | 113.83 ± 12.92 | 116.18 ± 9.02 |
| 25 °C for 24 h            | Precision (RSD, %) | 3.54               | 9.12          | 5.89          | 5.04               | 8.33           | 7.19          |
|                           | Accuracy (RE, %)   | 1.23               | -1.90         | -3.79         | 7.02               | -0.66          | 1.35          |
| -20 °C for 30 days        | Precision (RSD, %) | 4.04               | 6.82          | 2.90          | 5.52               | 5.49           | 4.47          |
|                           | Accuracy (RE, %)   | 3.76               | -2.69         | -0.43         | 2.95               | 3.17           | 1.90          |
| Three freeze-thaw         | Precision (RSD, %) | 7.42               | 13.57         | 2.26          | 3.25               | 5.63           | 5.26          |
|                           | Accuracy (RE, %)   | 0.54               | -0.43         | 2.20          | 8.47               | -0.26          | -2.19         |

**Table S9.** The linear range, regress equations, and LLOQs of FMN and BCA.

| Compounds | Tissue  | Calibration<br>range (ng/mL) | Regression equation  | Correlation<br>coefficient (r) | LLOQs<br>(ng/mL) |
|-----------|---------|------------------------------|----------------------|--------------------------------|------------------|
| FMN       | Heart   | 1-100                        | $Y=0.1695X + 0.1636$ | 0.9991                         | 1                |
|           | Liver   | 10-750                       | $Y=0.0650X + 0.9520$ | 0.9996                         | 10               |
|           | Spleen  | 1-80                         | $Y=0.1393X + 0.2404$ | 0.9992                         | 1                |
|           | Lungs   | 1-250                        | $Y=0.0871X + 0.2884$ | 0.9998                         | 1                |
|           | Kidneys | 10-500                       | $Y=0.0559X + 0.3989$ | 0.9995                         | 10               |
|           | Brain   | 1-100                        | $Y=0.0881X + 0.1637$ | 0.9992                         | 1                |
| BCA       | Heart   | 1-100                        | $Y=0.1269X + 0.1711$ | 0.9989                         | 1                |
|           | Liver   | 10-750                       | $Y=0.0521X + 0.9090$ | 0.9999                         | 10               |
|           | Spleen  | 1-80                         | $Y=0.1046X + 0.2248$ | 0.9992                         | 1                |
|           | Lungs   | 1-250                        | $Y=0.0618X + 0.7329$ | 0.9995                         | 1                |
|           | Kidneys | 10-500                       | $Y=0.0468X + 0.5373$ | 0.9999                         | 10               |
|           | Brain   | 1-100                        | $Y=0.0705X + 0.0350$ | 0.9993                         | 1                |

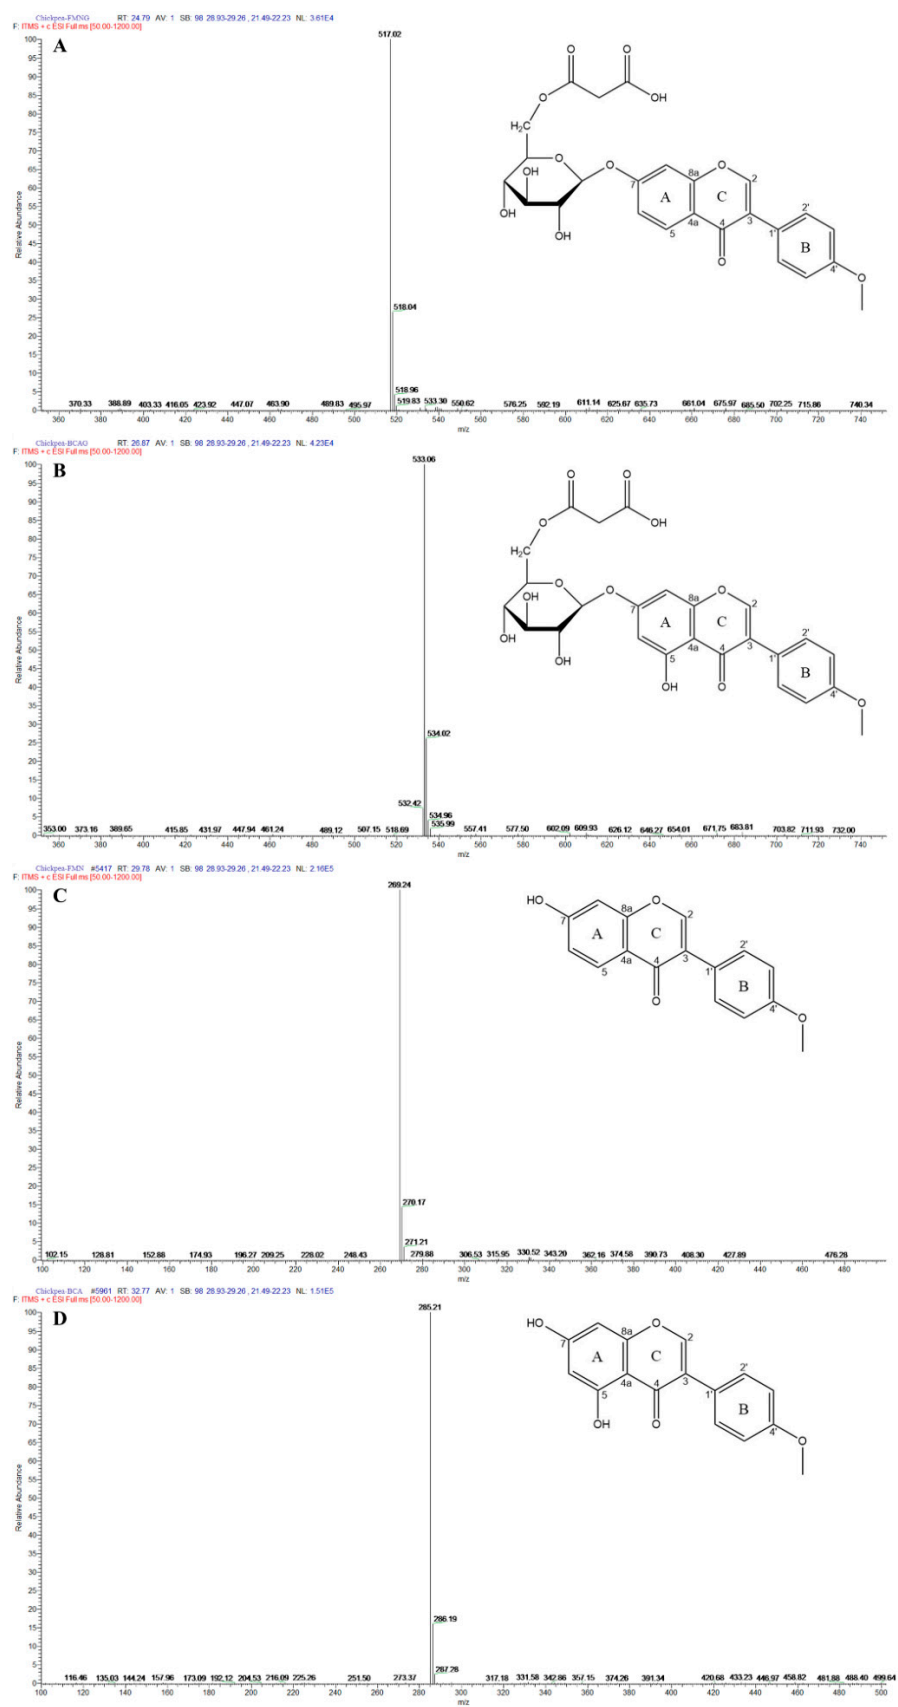

**Figure S1.** The MS spectra of principal isoflavones (figures A, B, C and D are the MS spectra of FMNG, BCAG, FMN and BCA, respectively).

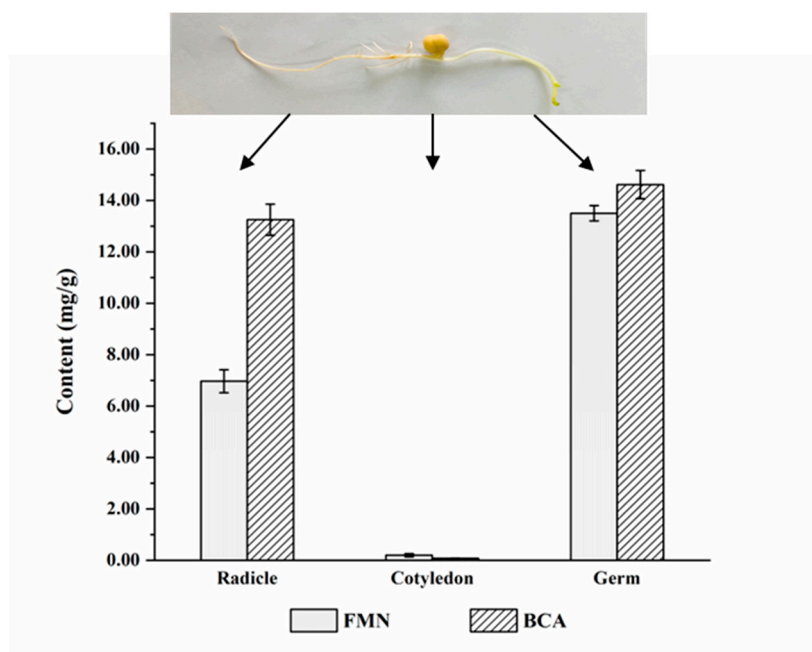

**Figure S2.** The FMN and BCA contents of each part of germinated chickpea on day 8.

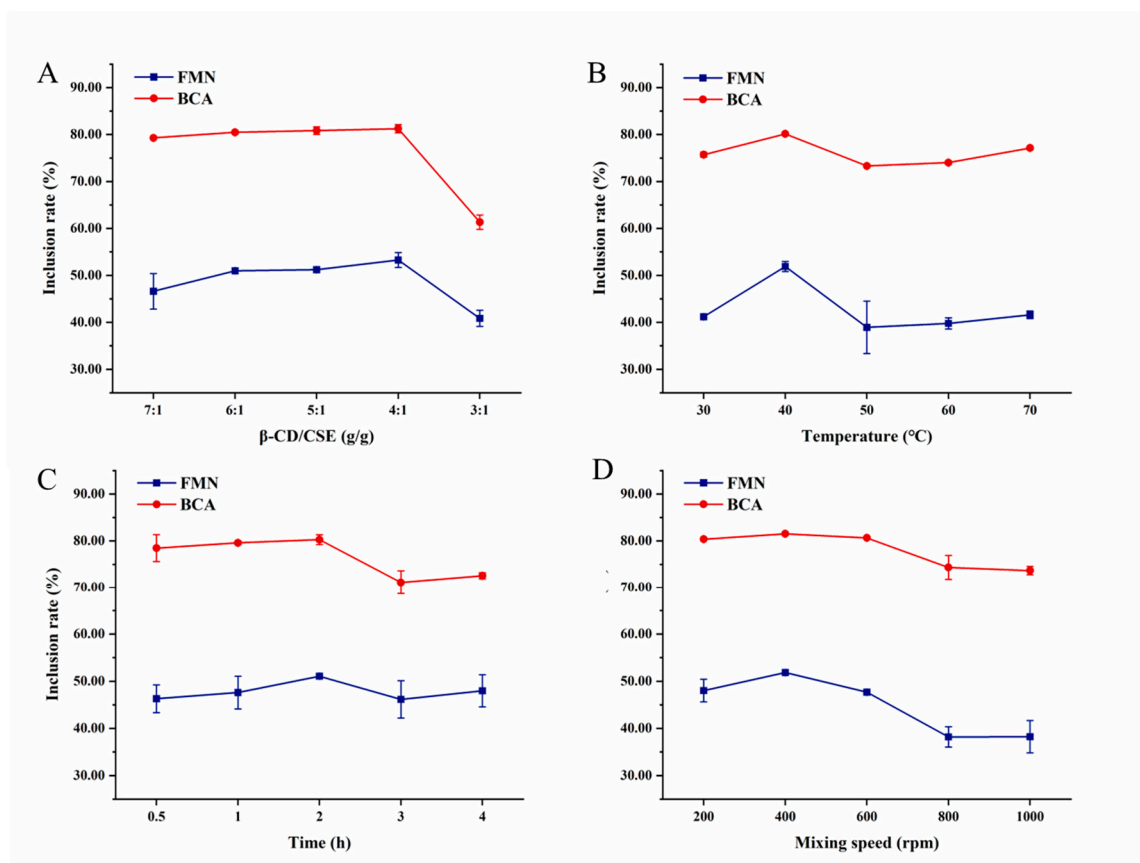

**Figure S3.** Effect of (A) mass ratio, (B) temperature, (C) time and (D) mixing speed on the inclusion rate of formononetin (FMN) and biochanin A (BCA).

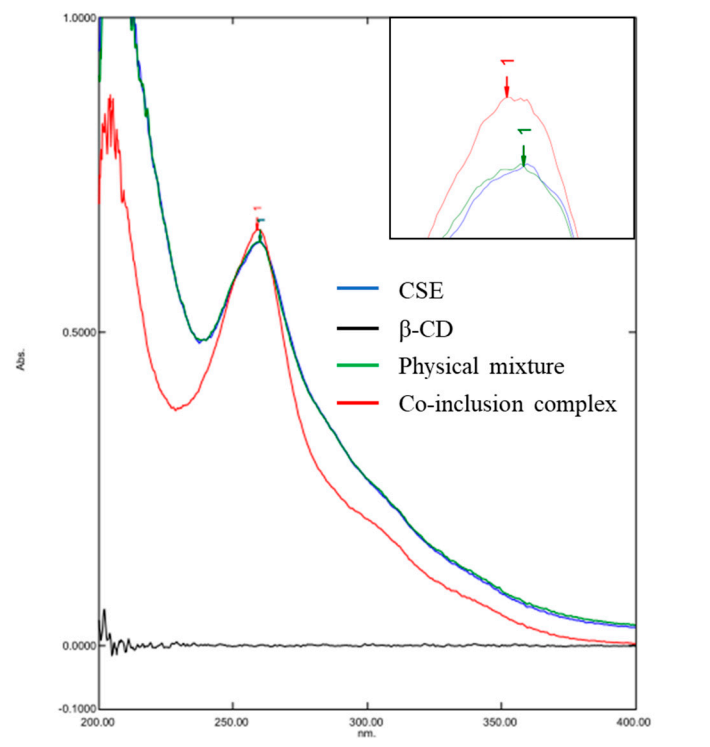

**Figure S4.** UV spectra of CSE,  $\beta$ -CD, physical mixture and inclusion complex.

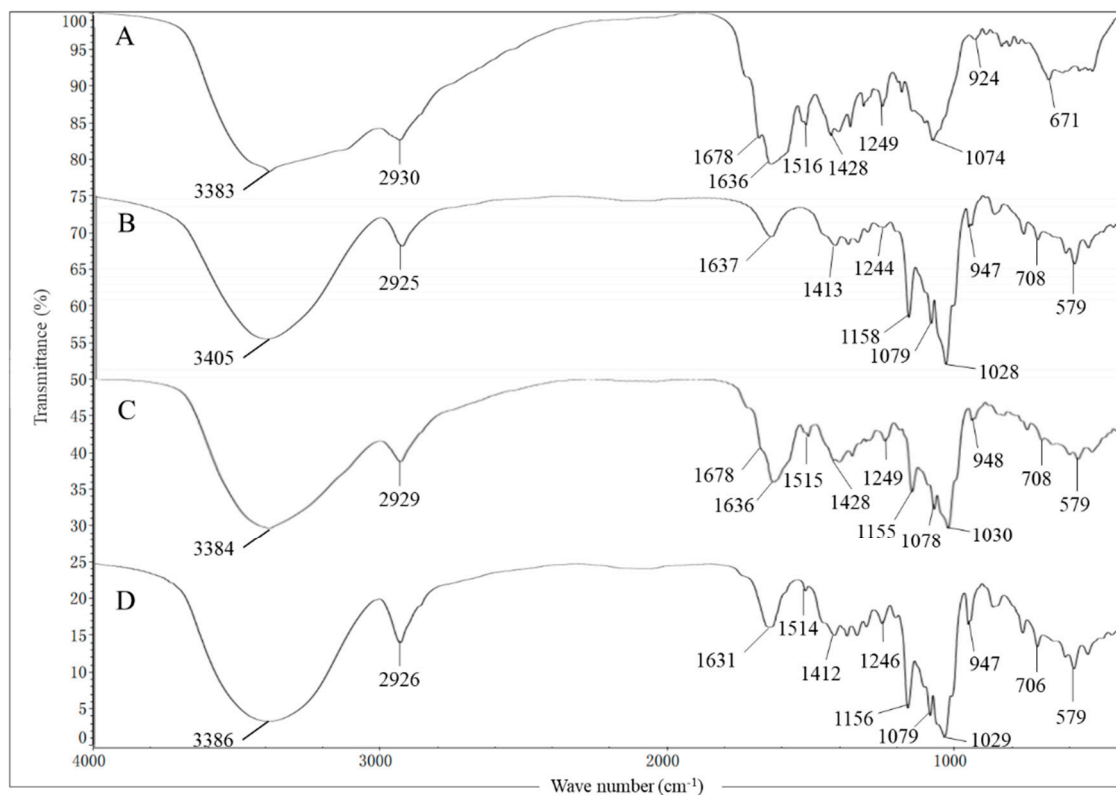

**Figure S5.** FT-IR spectra of (A) CSE, (B)  $\beta$ -CD, (C) physical mixture and (D) inclusion complex.
